# Supplementary material for: Active Triclinic Transtension in a Volcanic Arc: A Case of the El Salvador Fault Zone in Central America
Source: MDPI journal article supplement (doi:10.3390/geosciences12070266), 2022-06-30

## “Active triclinic transtension in a volcanic arc. The case of El Salvador Fault Zone in Central America”

Alonso-Henar, Jorge (1); Fernández, Carlos (1); Álvarez-Gómez, José Antonio (1); Canora, Carolina (2); Staller, Alejandra (3); Díaz, Manuel (4), Hernández, Walter (5), García, Ángela Valeria (4) Martínez-Díaz, José Jesús (1-6).

(1) Dpto. Geodinámica, Estratigrafía y Paleontología, Facultad de Ciencias Geológicas, Universidad Complutense de Madrid.; (2) Dpto. Geología, Facultad de Ciencias, Universidad Autónoma de Madrid.; (3) Dpto. Topografía y Cartografía, ETSI Topografía, Geodesia y Cartografía, Universidad Politécnica de Madrid; (4) Observatorio de Amenazas y Recursos Naturales del Ministerio de Medio Ambiente y Recursos Naturales, San Salvador, El Salvador.; (5) El Salvador University, Ciudad Universitaria, San Salvador, El Salvador. (6) Instituto de Geociencias – UCM-CSIC.

In this document we show the all data plots comparing model and nature when applied the triclinic transtension model to the El Salvador Fault Zone. Here we expose all the steps of the followed protocol based on Fernández et al. (2013) and adapted for this case. For every value of the strike of the Shear Zone Boundary (N90°E; N100°E and N110°E), we have investigated a wide spectrum of kinematic features of the model (such as the kinematic vorticity number and the rake of the simple shearing  $\phi$ ). All the satisfactory results are summarized in main text and in the Table 2 and the following table. The Step 2', used as a substitute of the Step 2, is exposed at the end of this document. All details are explained in the main text.

| Orientation  | $\phi$ (s) | Wk    | Reliability |
|--------------|------------|-------|-------------|
| N90°E; 70°S  | 20         | 0.99  | Poor        |
|              | 25         | 0.99  |             |
|              |            | 0.99  |             |
| N100°E; 70°S | 25         | 0.99  | Fair        |
|              | 30         | 0.81  |             |
|              |            | 0.9   |             |
|              |            | 0.95  |             |
|              | 40         | 0.99  | Fair        |
|              |            | 0.9   |             |
|              |            | 0.95  |             |
|              | 50         | 0.9   | Fair        |
|              |            | 0.95  |             |
|              |            | 0.99  |             |
|              | 30         | 0.7   | Poor        |
|              | 60         | 0.95  |             |
|              |            | 0.99  |             |
| N110°E; 70°S | 50         | 0.7   | Good        |
|              |            | 0.81  |             |
|              |            | 0.9*  |             |
|              |            | 0.95* |             |
|              | 40         | 0.99  | Fair        |
|              |            | 0.7   |             |
|              |            | 0.81  |             |
|              |            | 0.9   |             |
|              | 60         | 0.95  | Fair        |
|              |            | 0.9   |             |
|              | 60         | 0.7   | Poor        |
|              |            | 0.81  |             |

# ESFZ N90°E

## STEP 1

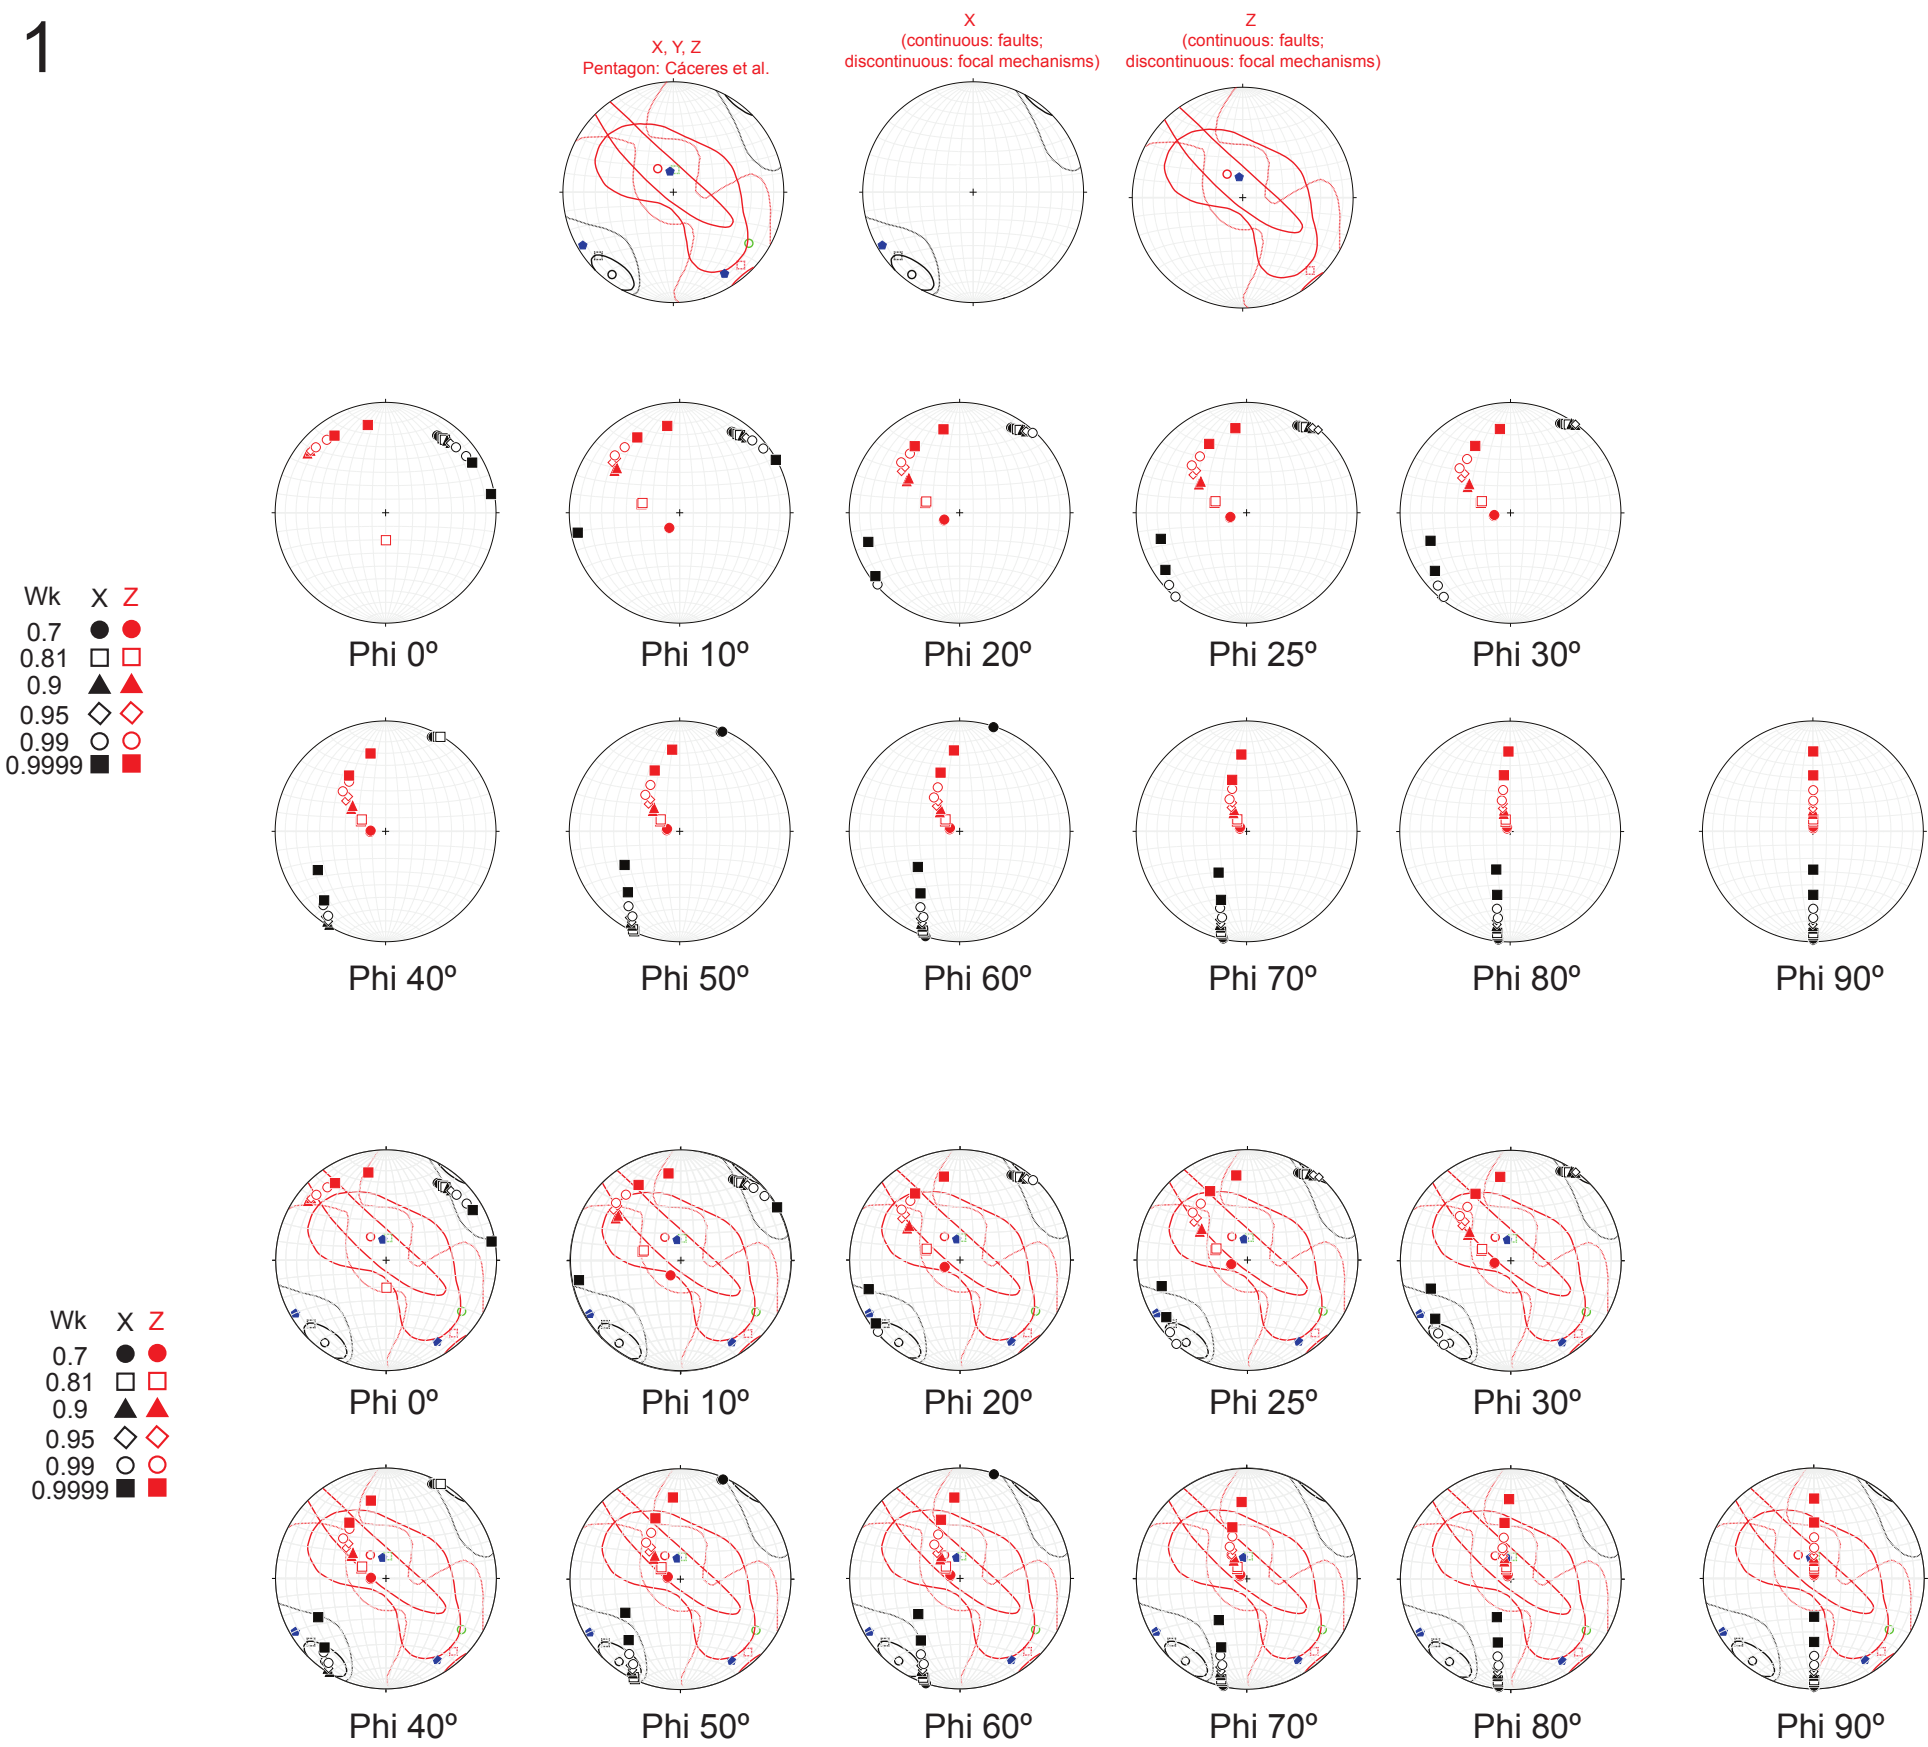

## STEP 3

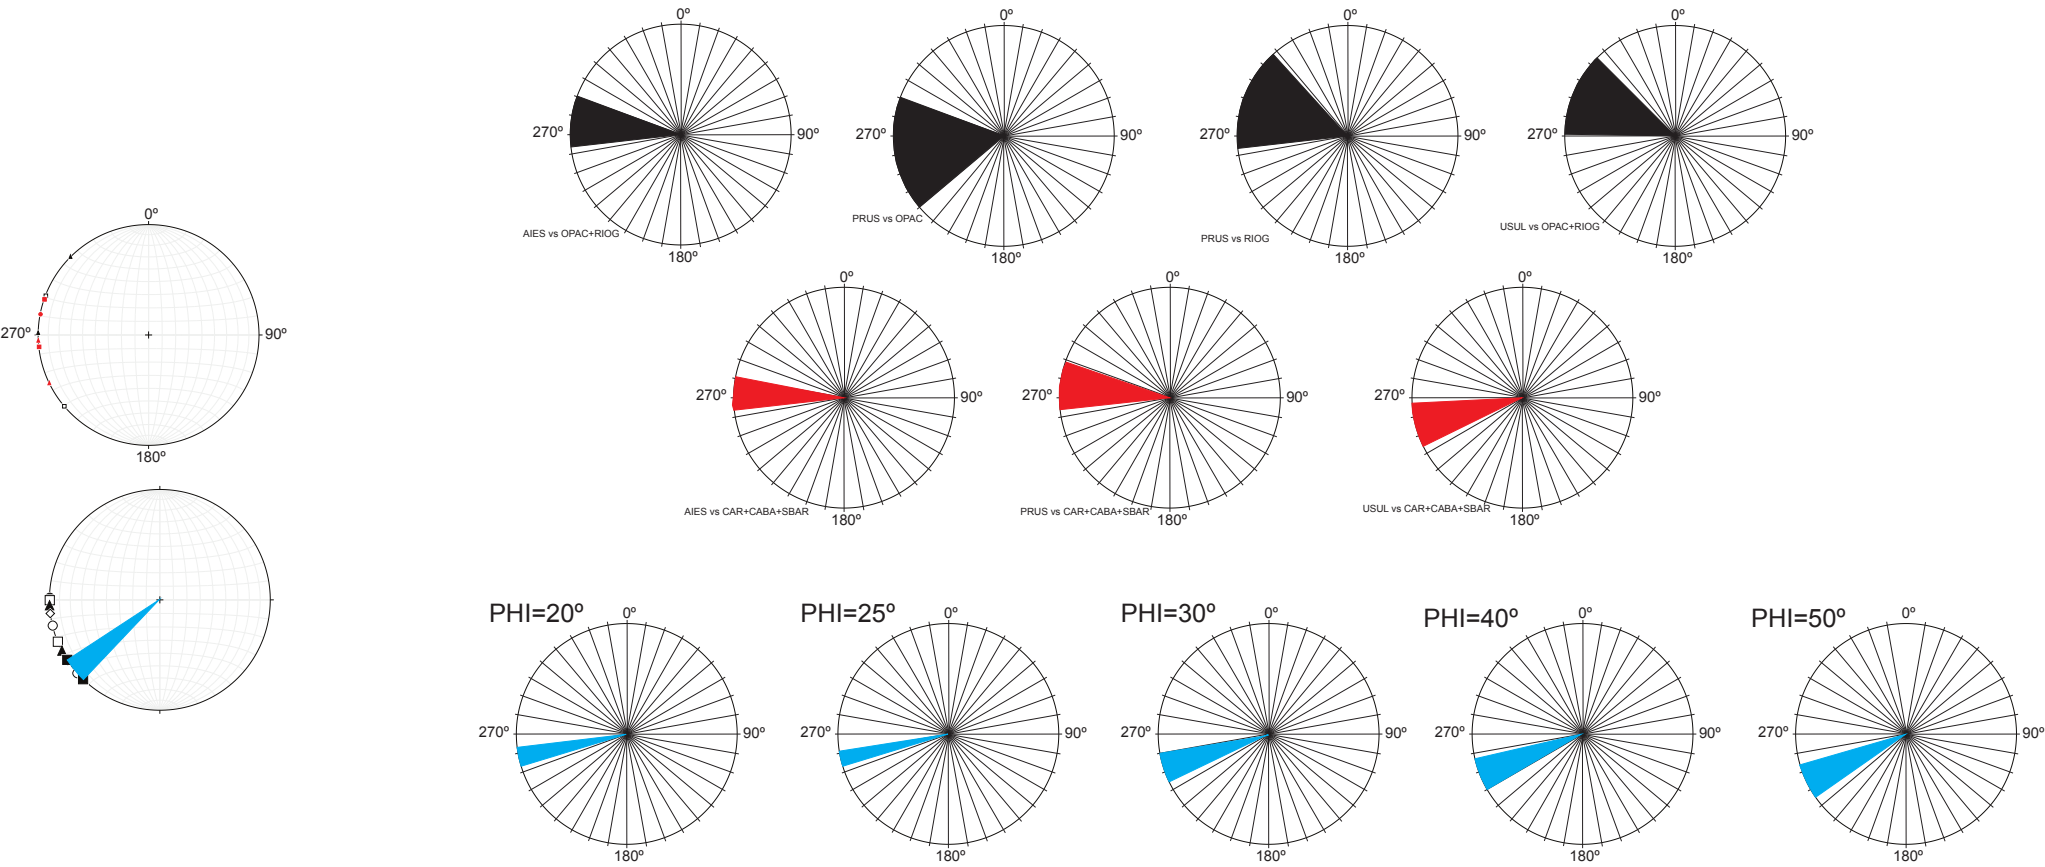

# Step 2: SZB oriented N90°E; 70°S

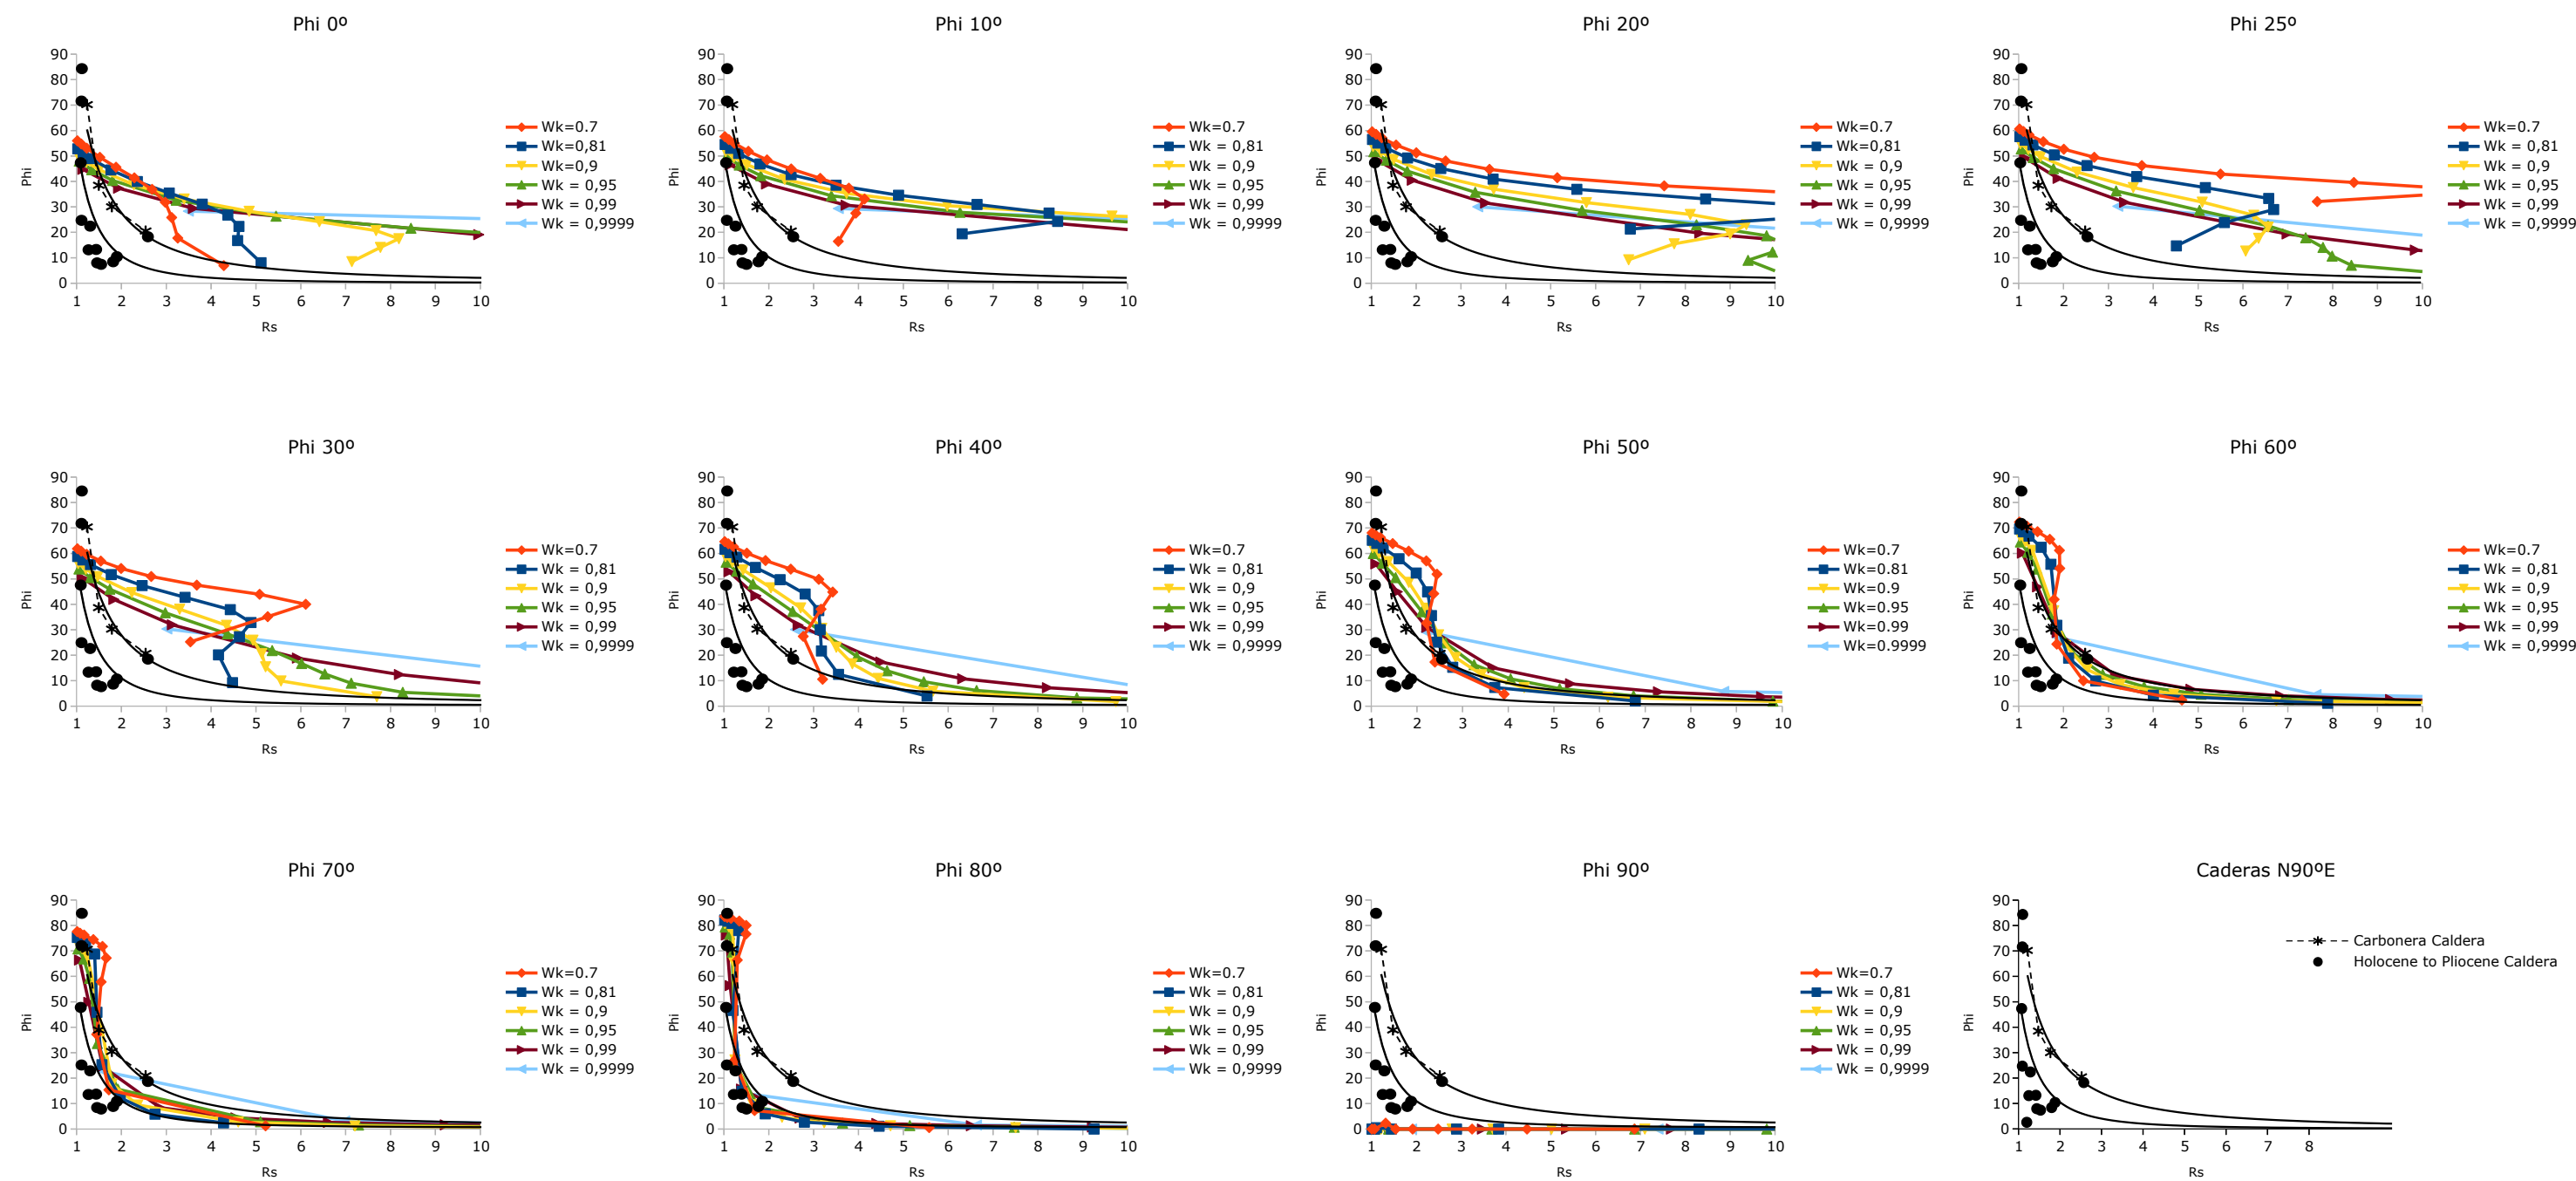

# ESFZ N100°E

## STEP 1

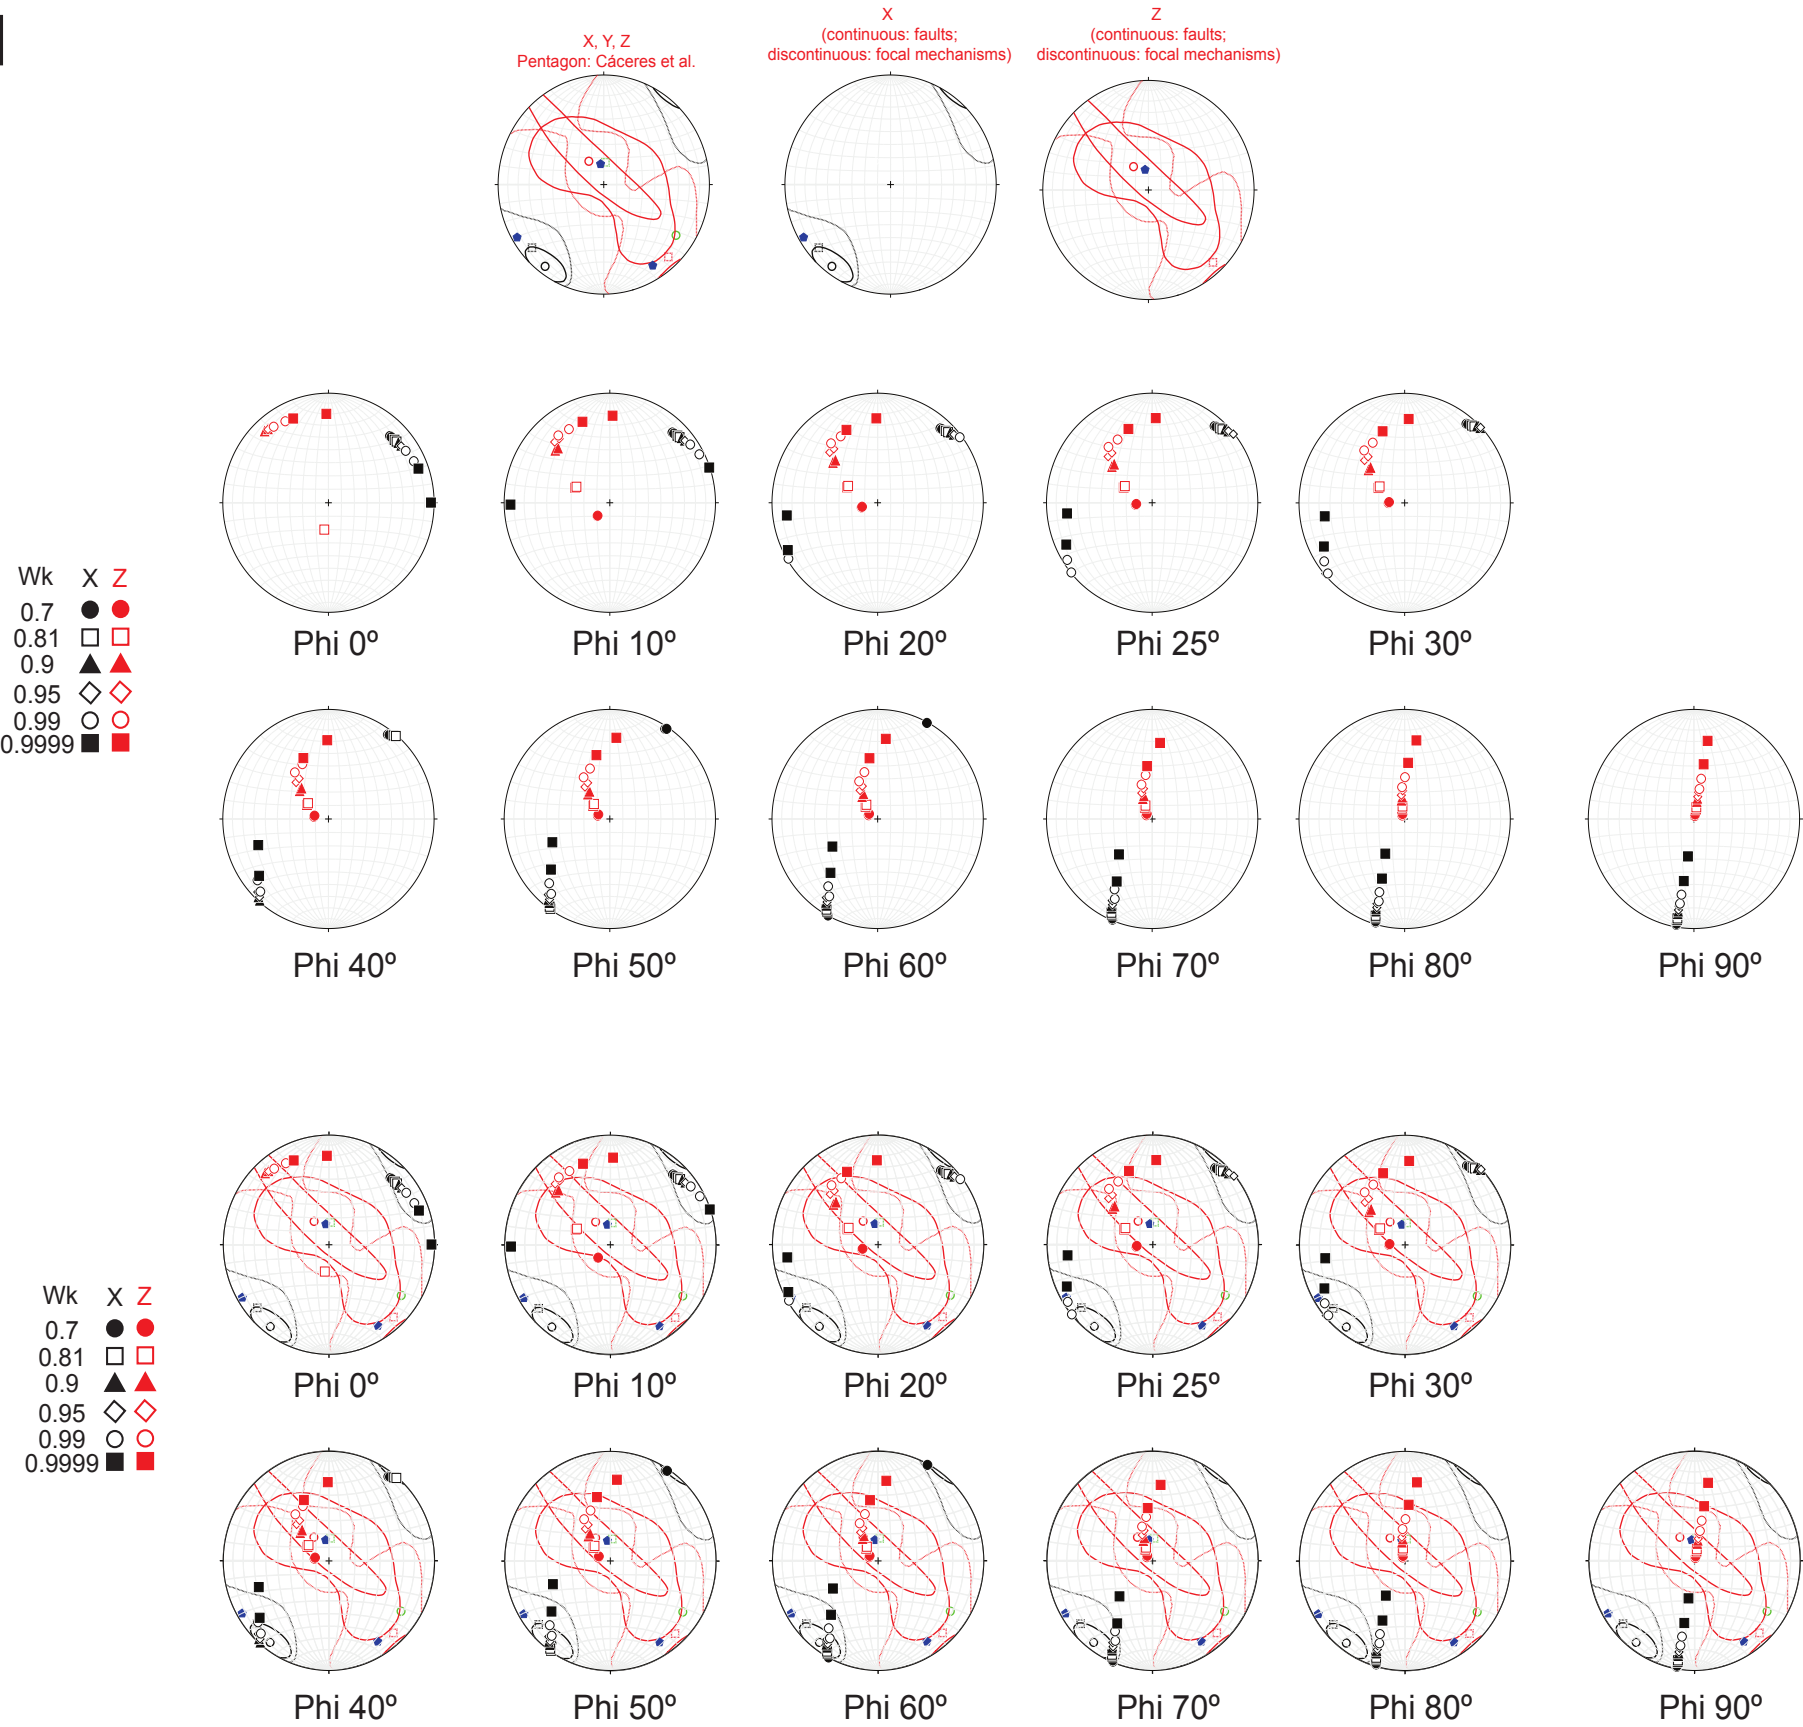

## STEP 3

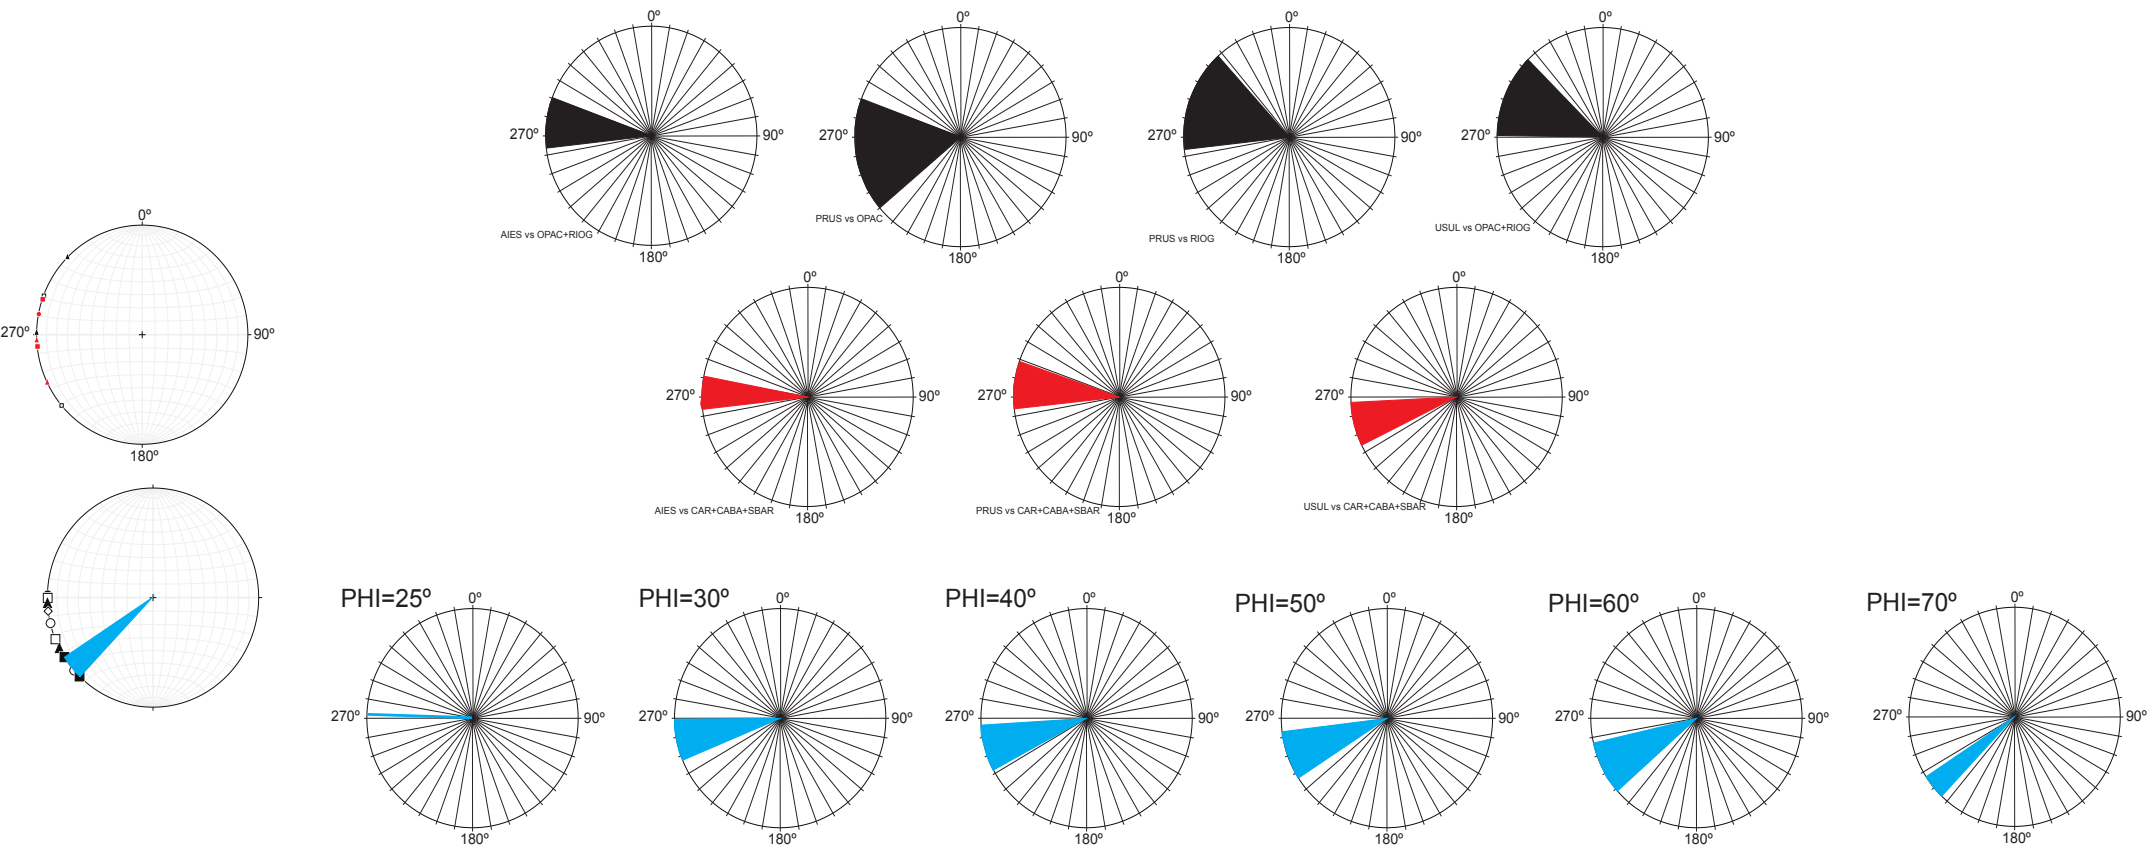



# Step 2: SZB oriented N100°E; 70°S

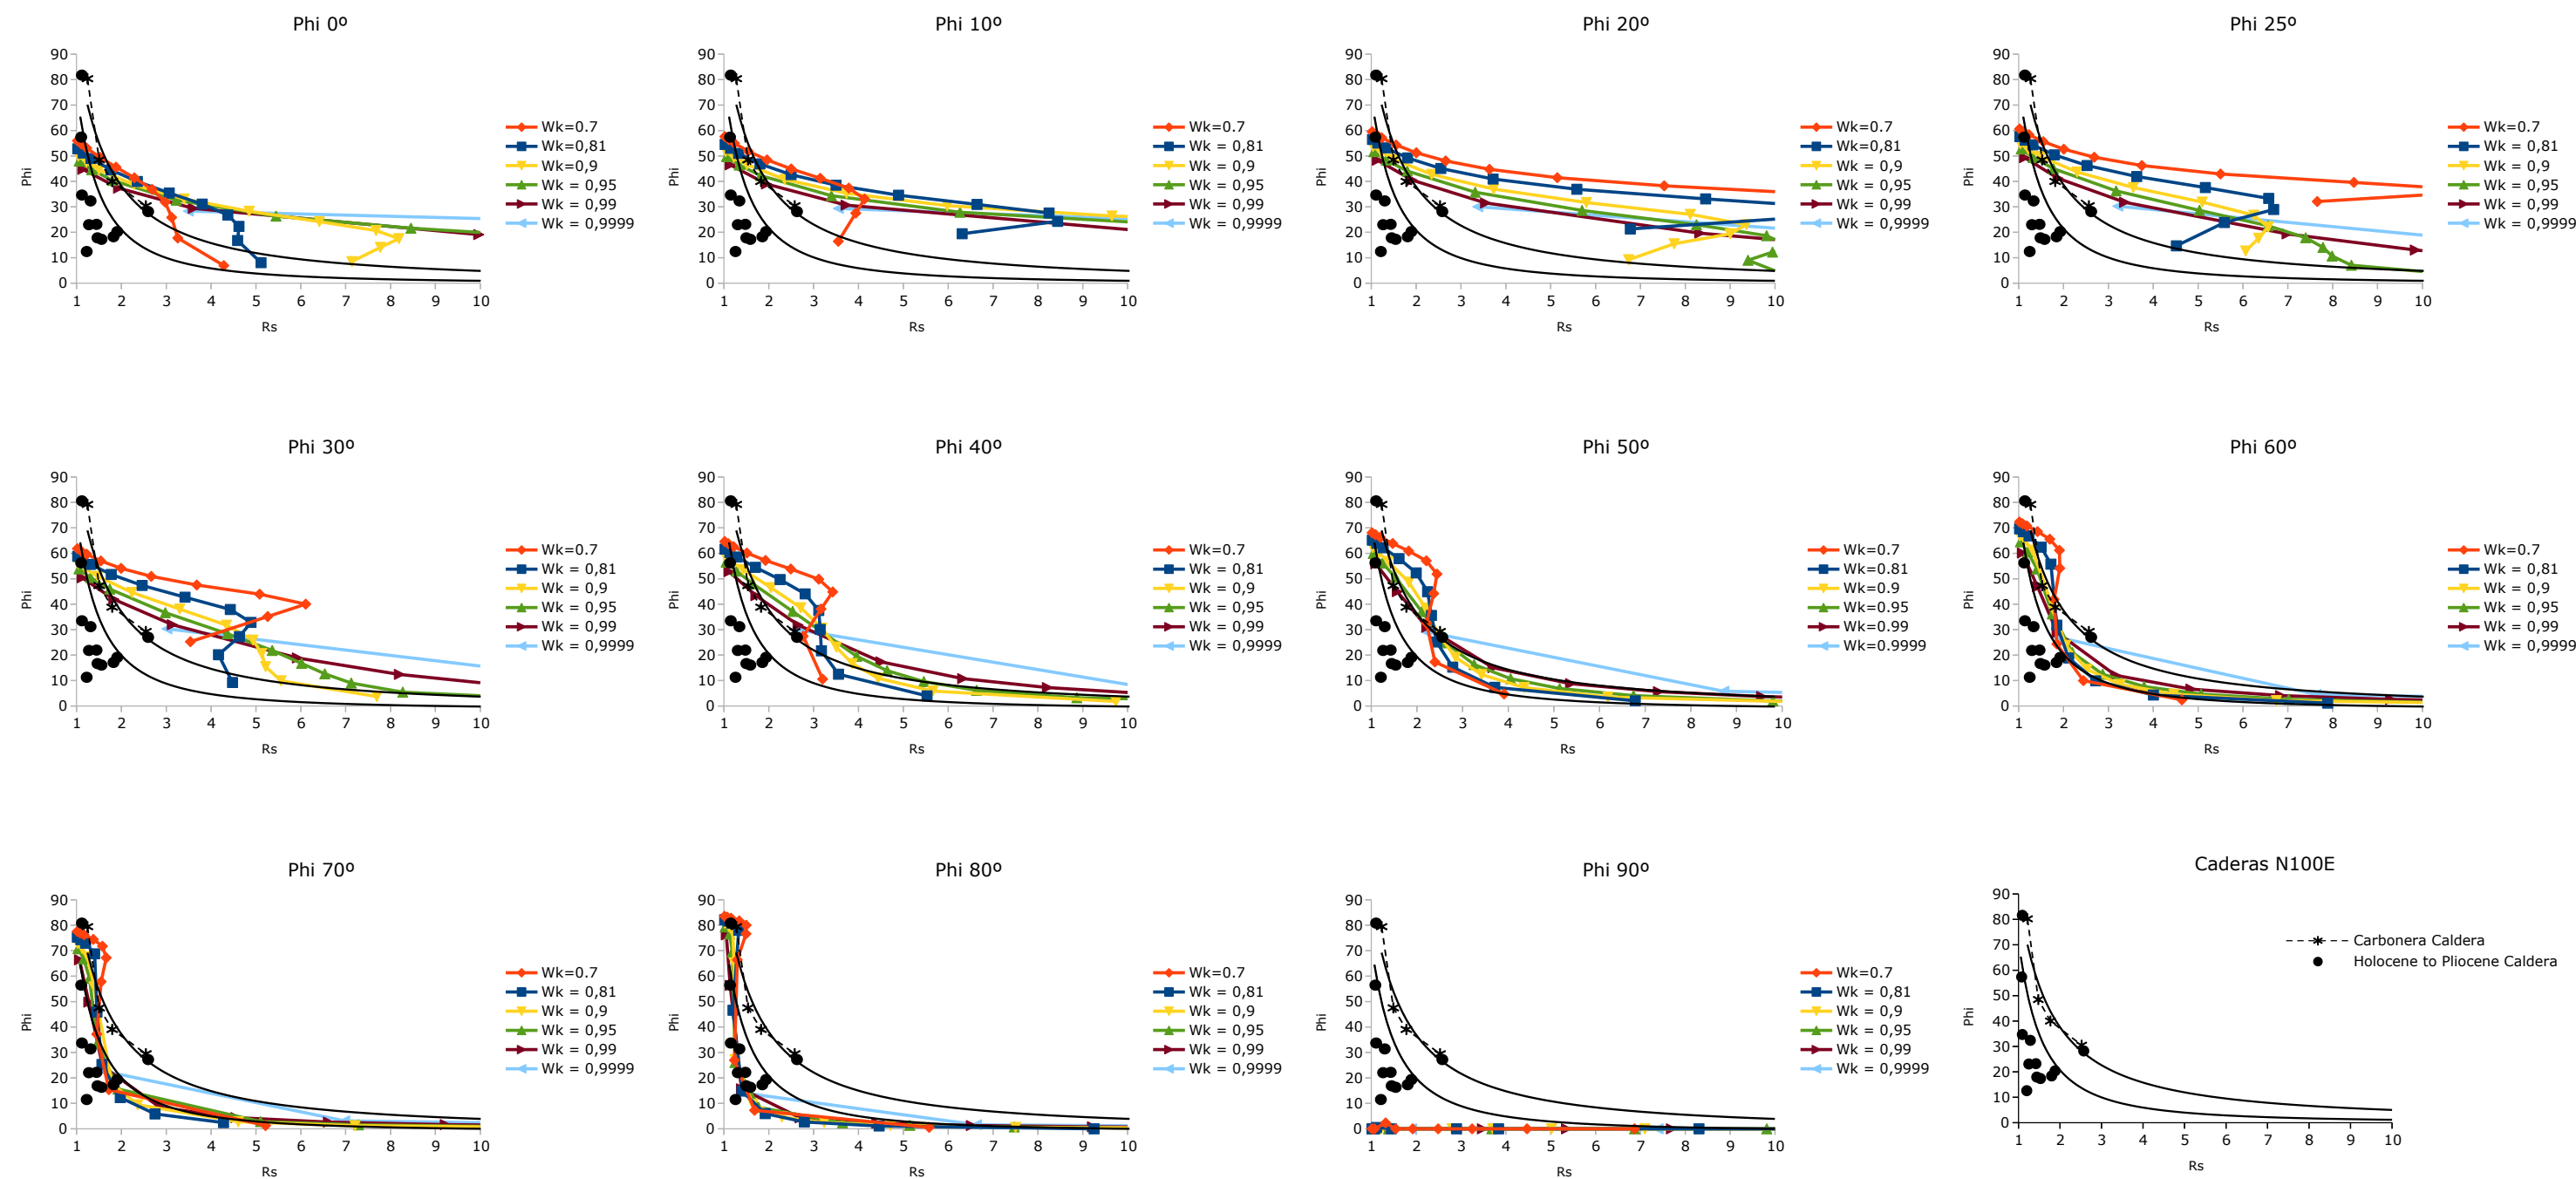

# ESFZ 110°E

## STEP 1

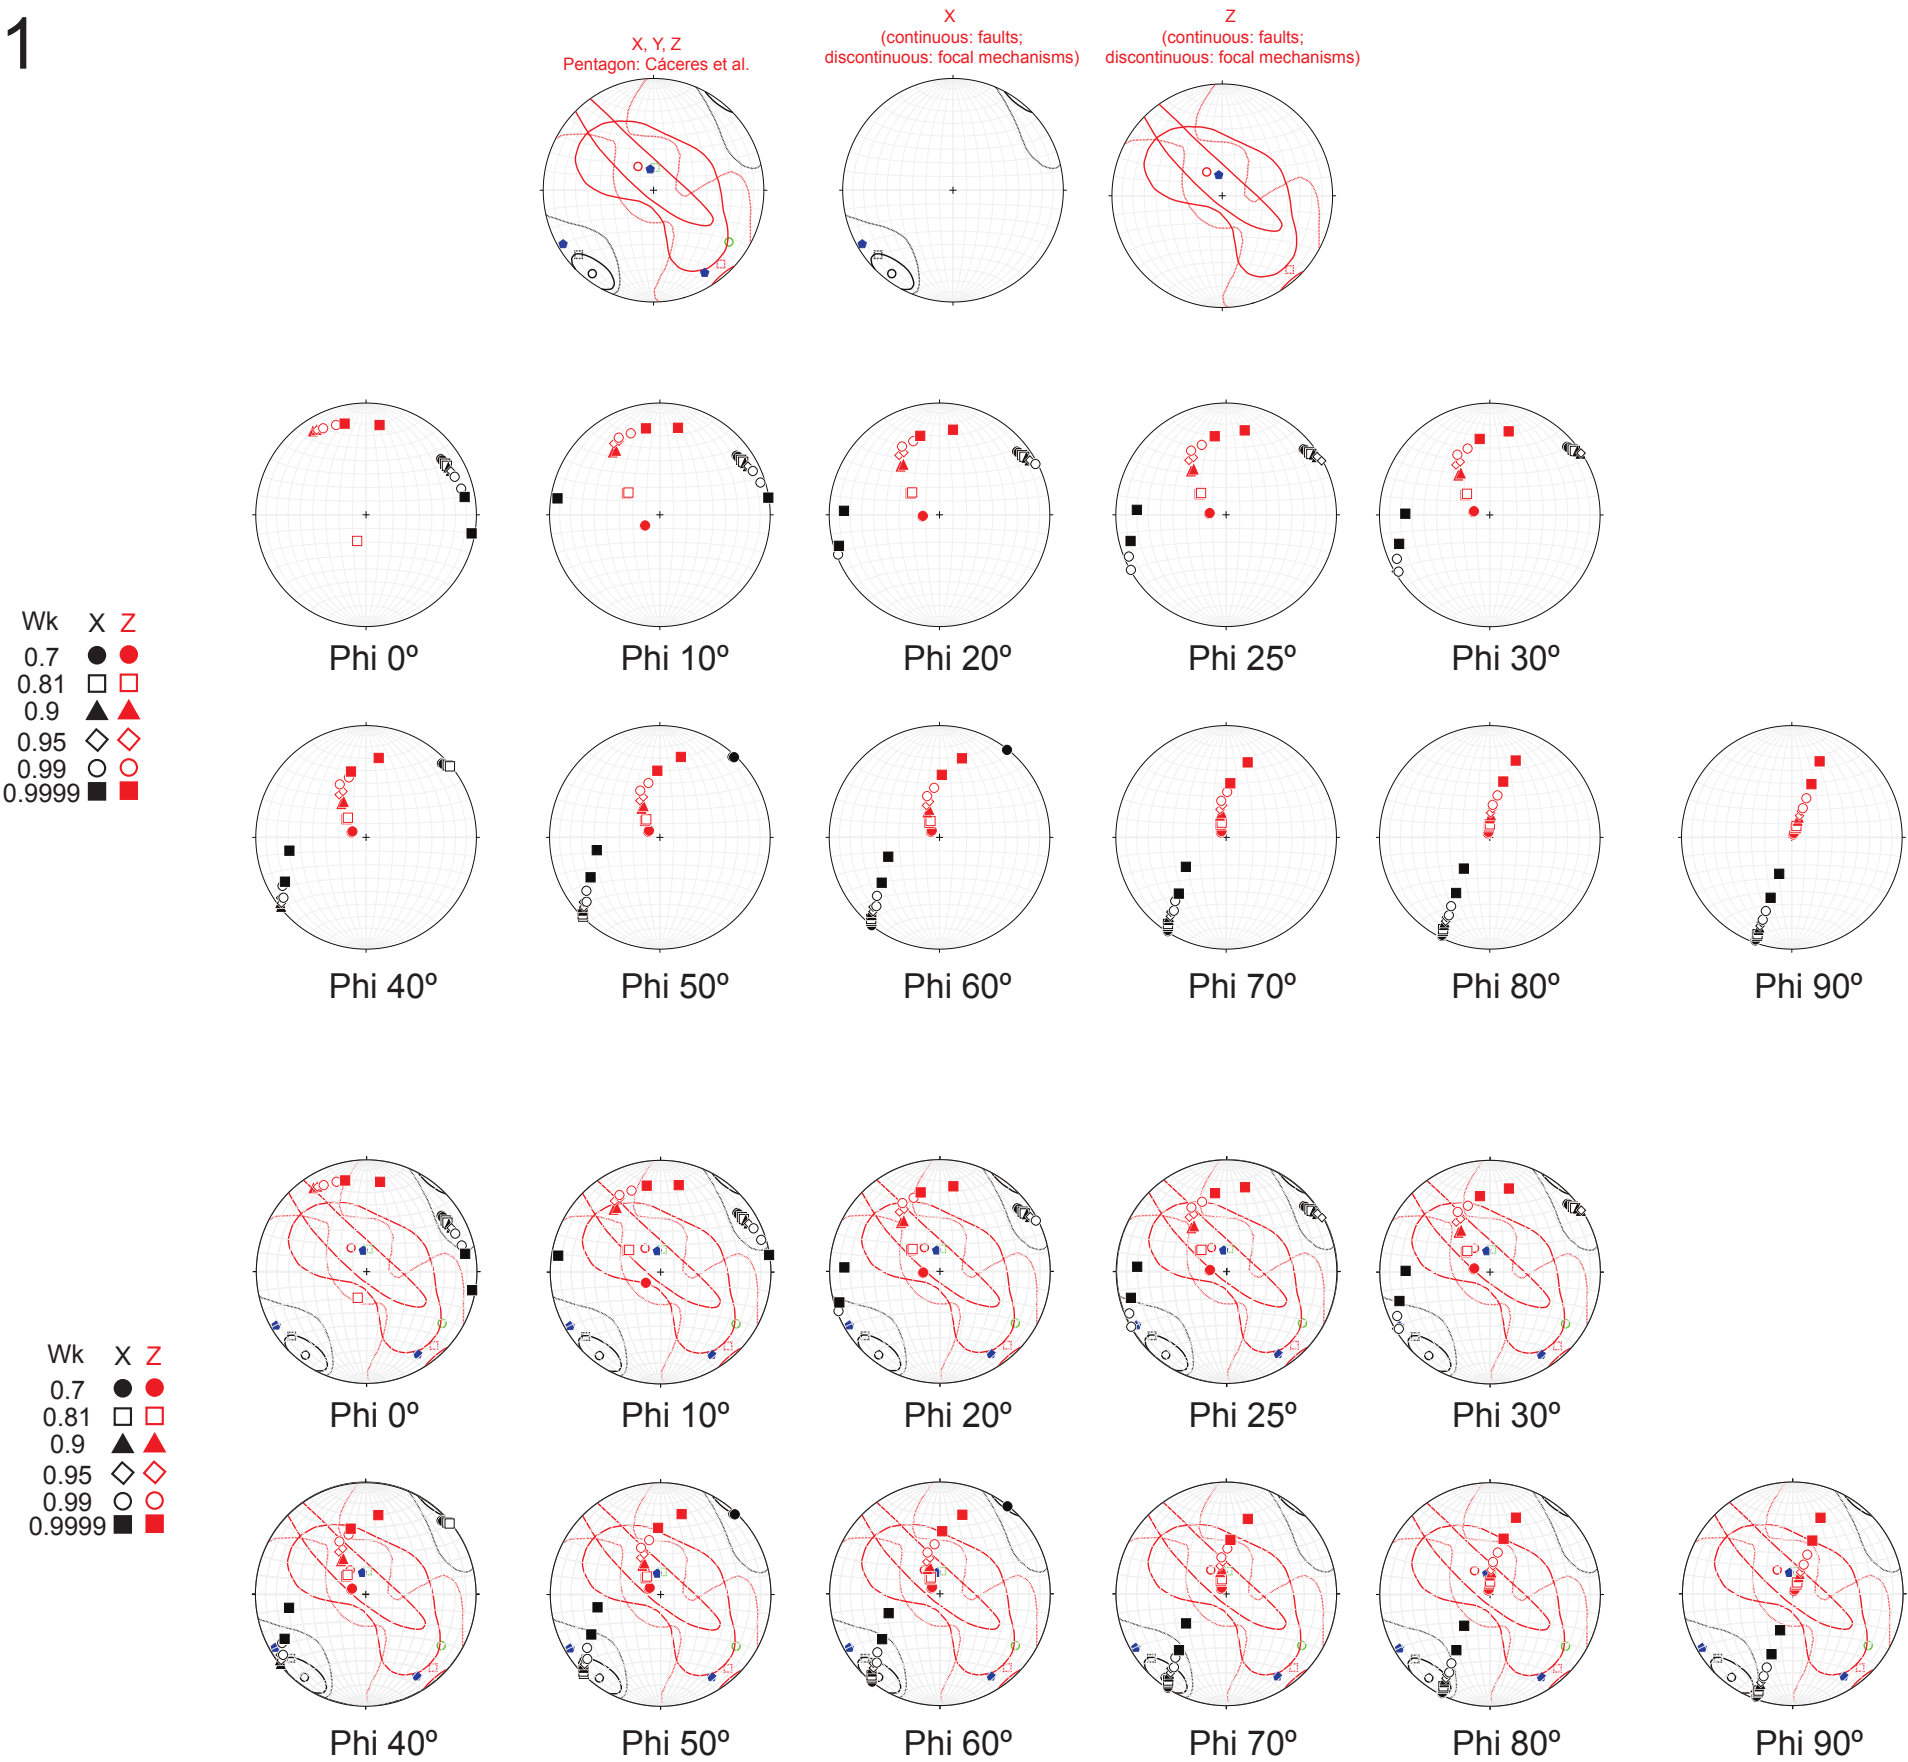

## STEP 3

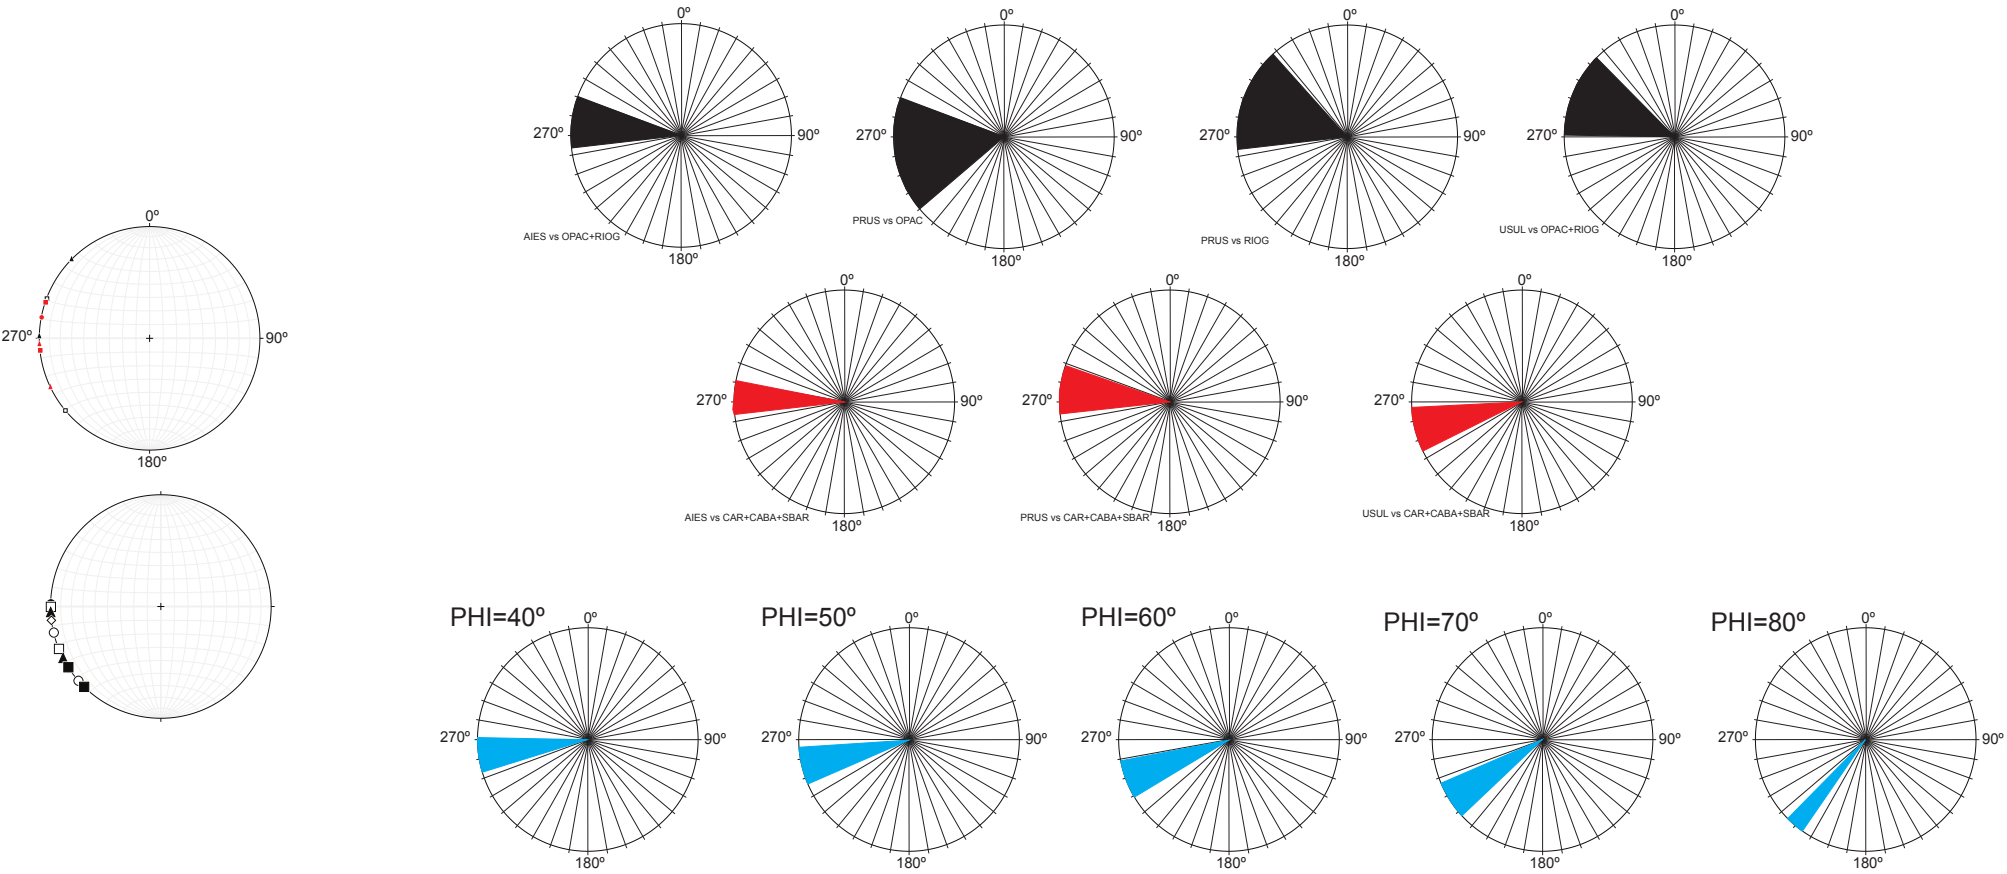

# Step 2: SZB oriented N110°E; 70°S

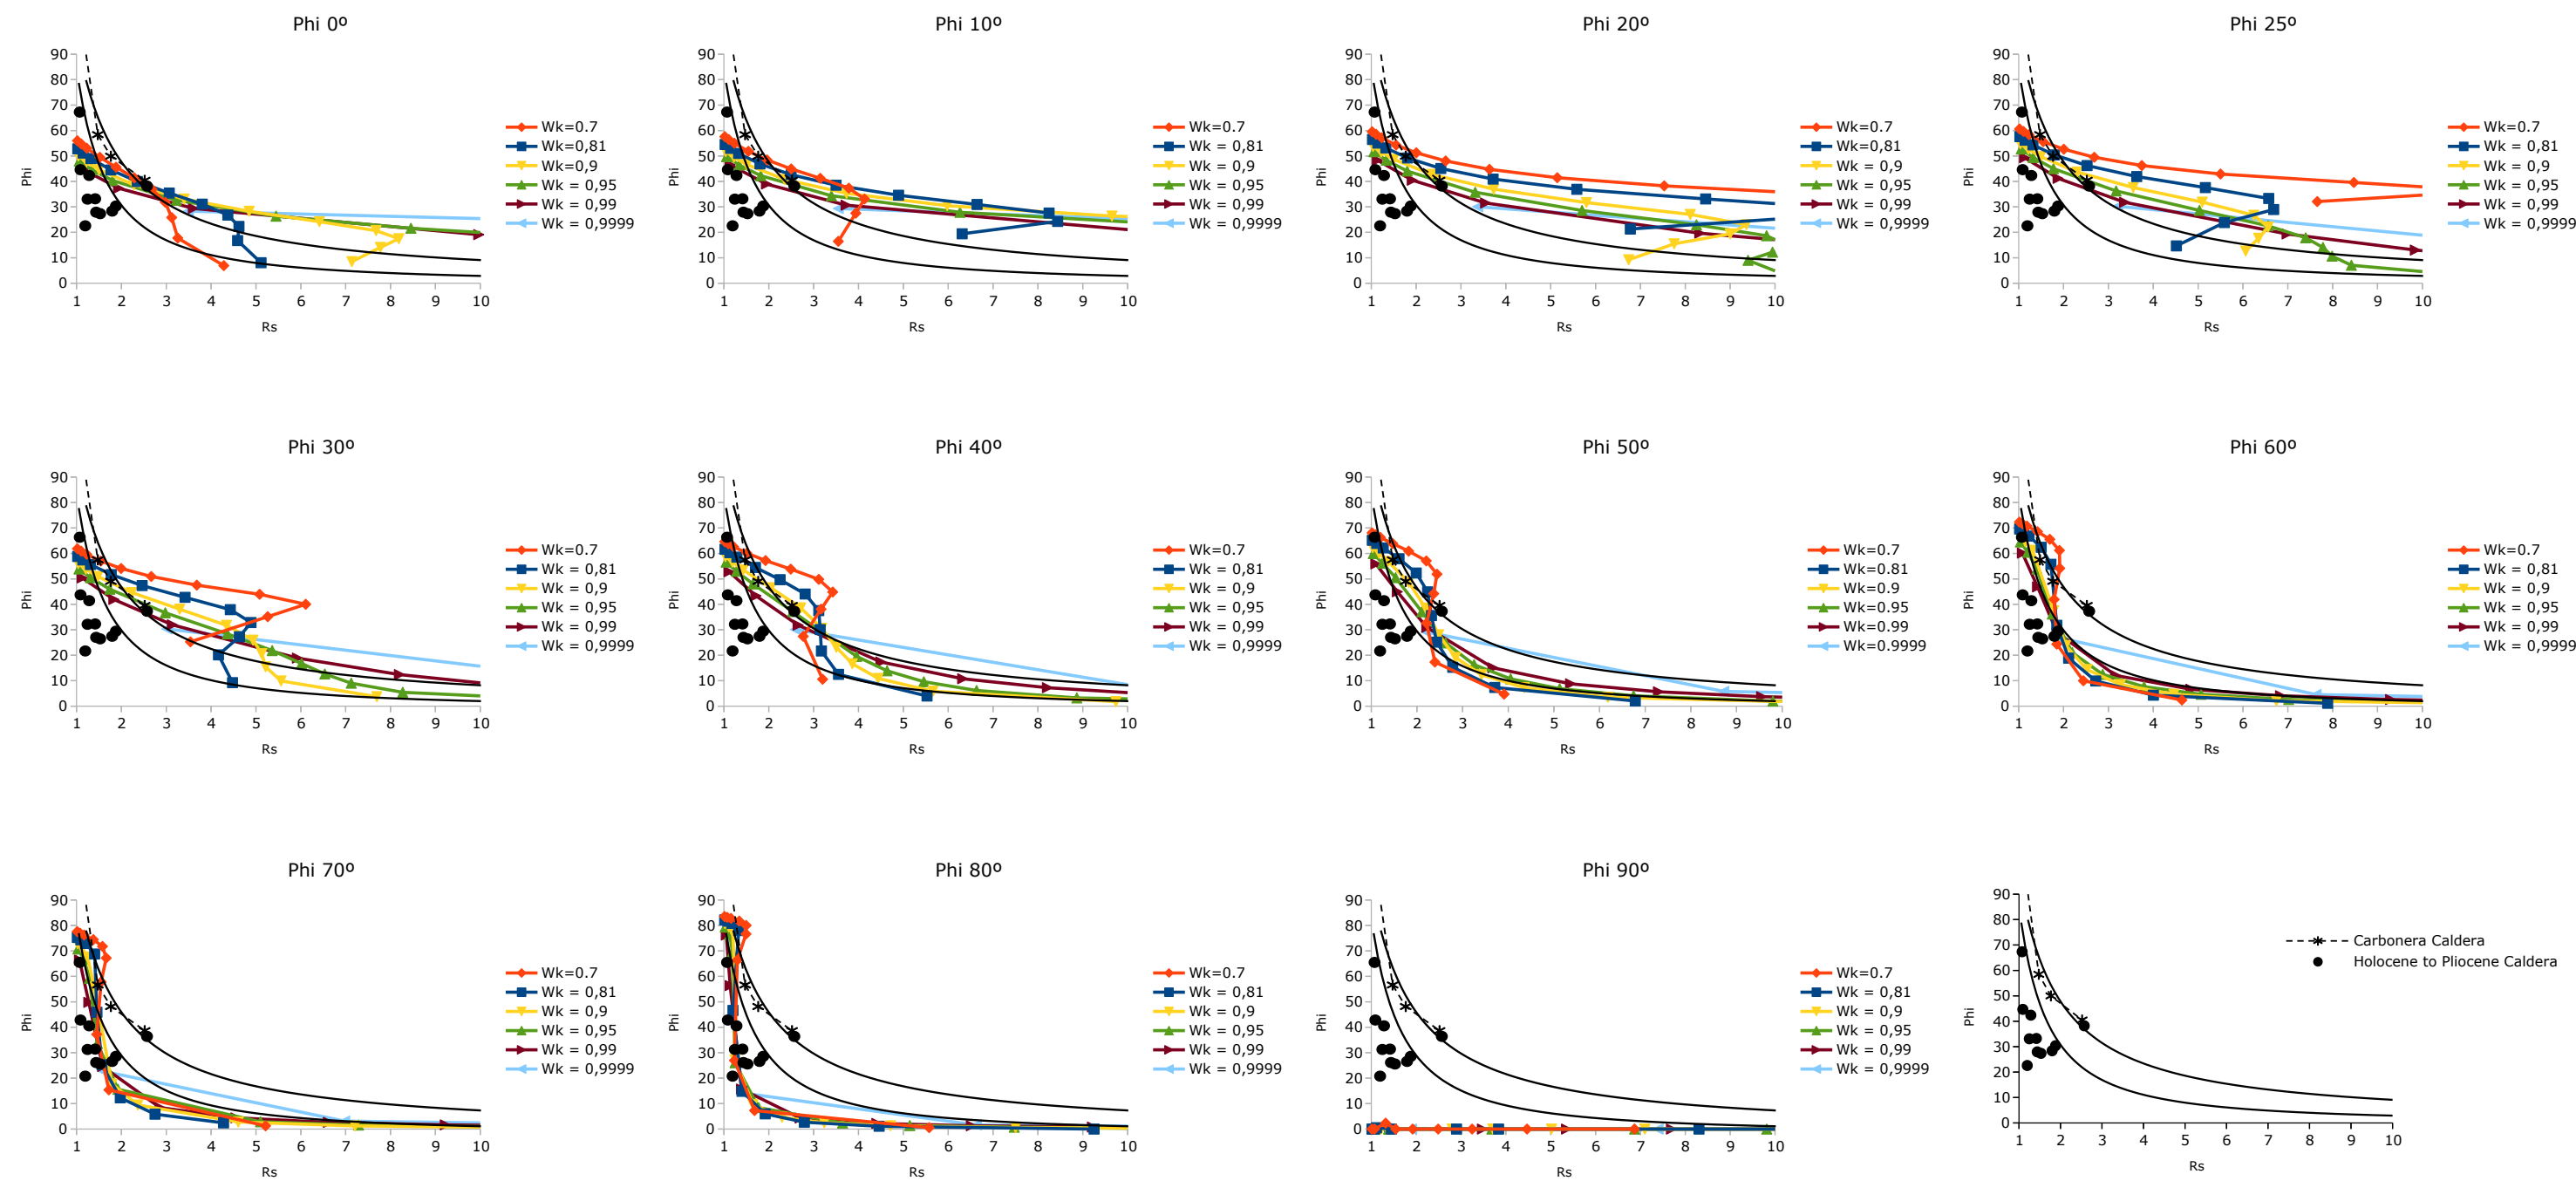

ESFZ N90°E; 70°S°

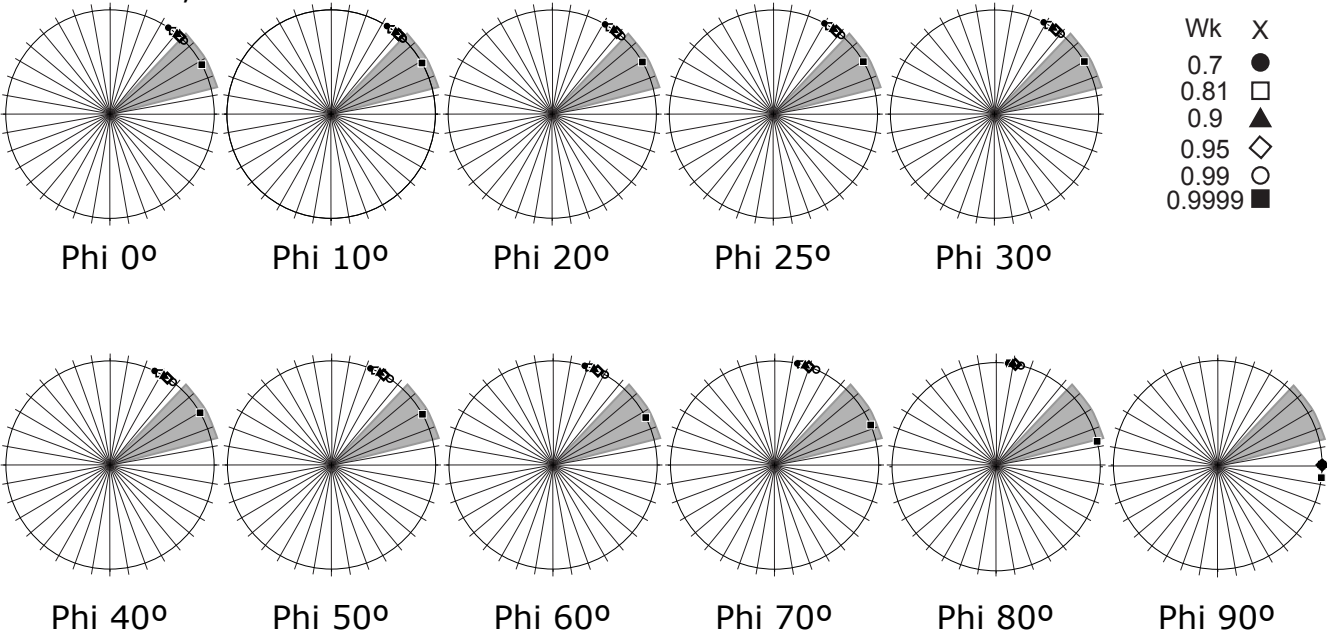

ESFZ N100°E; 70°S°

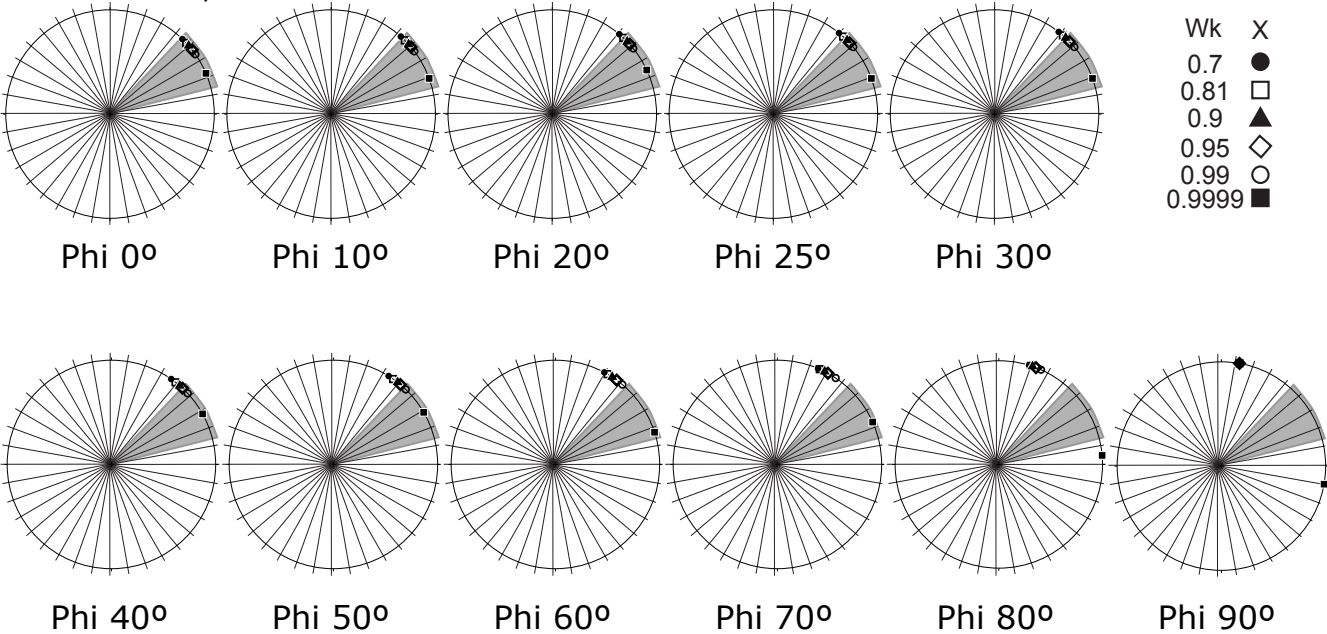

ESFZ N110°E; 70°S°

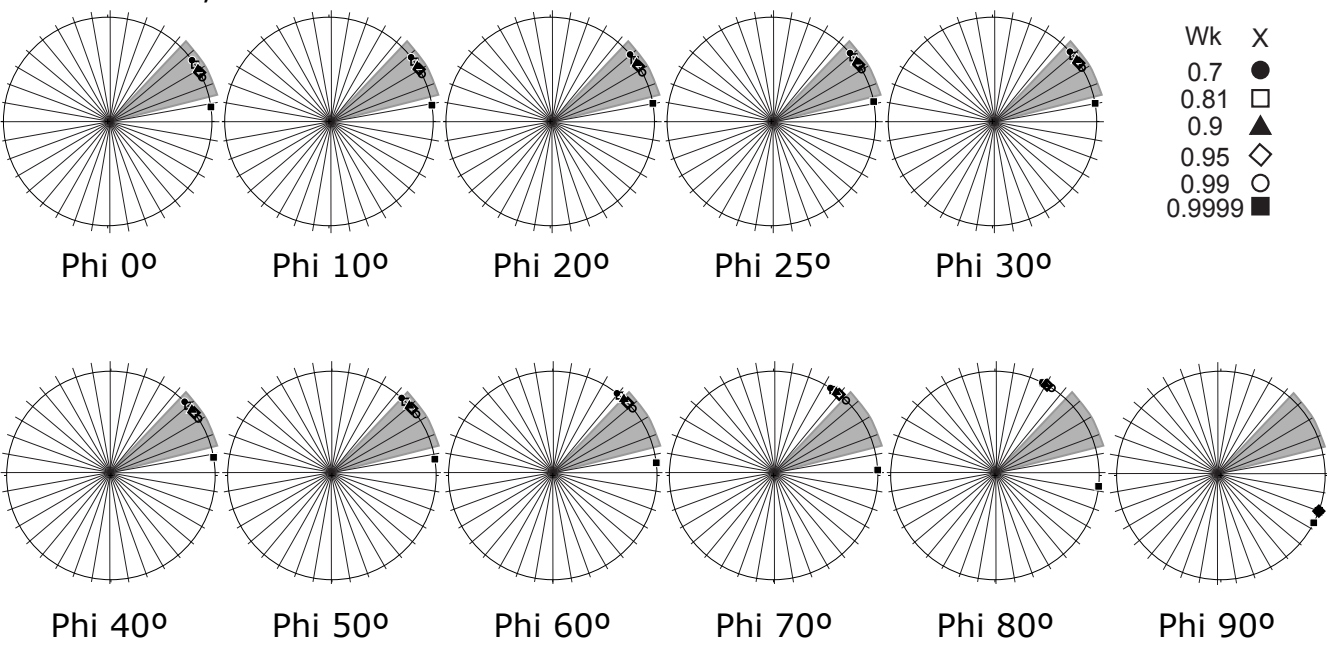

Supplement: s1 [file s1]
