# Supplementary material for: Active Triclinic Transtension in a Volcanic Arc: A Case of the El Salvador Fault Zone in Central America
Source: MDPI journal article supplement (doi:10.3390/geosciences12070266), 2022-06-30
Supplement: s1 [file s1]

## “Active triclinic transtension in a volcanic arc. The case of El Salvador Fault Zone in Central America”

Alonso-Henar, Jorge (1); Fernández, Carlos (1); Álvarez-Gómez, José Antonio (1); Canora, Carolina (2); Staller, Alejandra (3); Díaz, Manuel (4), Hernández, Walter (5), García, Ángela Valeria (4) Martínez-Díaz, José Jesús (1-6).

(1) Dpto. Geodinámica, Estratigrafía y Paleontología, Facultad de Ciencias Geológicas, Universidad Complutense de Madrid.; (2) Dpto. Geología, Facultad de Ciencias, Universidad Autónoma de Madrid.; (3) Dpto. Topografía y Cartografía, ETSI Topografía, Geodesia y Cartografía, Universidad Politécnica de Madrid; (4) Observatorio de Amenazas y Recursos Naturales del Ministerio de Medio Ambiente y Recursos Naturales, San Salvador, El Salvador .; (5) El Salvador University, Ciudad Universitaria, San Salvador, El Salvador. (6) Instituto de Geociencias – UCM-CSIC.

In this document we show the tables with results of comparison between model and nature. Tables show in color code the reliability given for each step. Only when steps 1, 2’ and 3 have good fit we considered that model explains nature. Further explanation in texts and Figure 6. A summary of the results are shown in the following table.

| Orientation   | $\phi$ (s) | Wk    | Reliability |
|---------------|------------|-------|-------------|
| N90°E; 70°S   | 20         | 0.99  | Poor        |
|               | 25         | 0.99  |             |
|               |            | 0.99  |             |
| N100°E; 70°S  | 25         | 0.99  | Fair        |
|               | 30         | 0.81  |             |
|               |            | 0.9   |             |
|               |            | 0.95  |             |
|               |            | 0.99  |             |
|               | 40         | 0.9   | Fair        |
|               |            | 0.95  |             |
|               |            | 0.99  |             |
|               | 50         | 0.9   | Fair        |
|               |            | 0.95  |             |
|               |            | 0.99  |             |
|               | 30         | 0.7   | Poor        |
|               | 60         | 0.95  |             |
|               |            | 0.99  |             |
| N110°E ; 70°S | 50         | 0.7   | Good        |
|               |            | 0.81  |             |
|               |            | 0.9*  |             |
|               |            | 0.95* |             |
|               |            | 0.99  |             |
|               | 40         | 0.7   | Fair        |
|               |            | 0.81  |             |
|               |            | 0.9   |             |
|               |            | 0.95  |             |
|               | 60         | 0.9   | Fair        |
|               |            | 0.95  |             |
|               | 60         | 0.7   | Poor        |
|               |            | 0.81  |             |
