# Supplementary material for: Active Triclinic Transtension in a Volcanic Arc: A Case of the El Salvador Fault Zone in Central America
Source: MDPI journal article supplement (doi:10.3390/geosciences12070266), 2022-06-30
Supplement: s1 [file s1]

Strain rate estimated in subnetwork

zfesnet\_CA.vel - 34 estaciones ZFESNET  
Delaunay Triangulation (GMT)

|           |                | COOR. BARICENTRO |         | DIRECCIONES PPALES (ε1 y ε2 y sus precisiones) |         |          |         | orientación del eje máxima def. ε2 (respecto al norte) |          |
|-----------|----------------|------------------|---------|------------------------------------------------|---------|----------|---------|--------------------------------------------------------|----------|
| TRIANGLE  |                | LON              | LAT     | EPS1                                           | EPS1SIG | EPS2     | EPS2SIG | THETA                                                  | THETASIG |
|           | corners        | (deg)            | (deg)   | (1/yr)                                         | (1/yr)  | (1/yr)   | (1/yr)  | (deg)                                                  | (deg)    |
| SUBNET_11 | SSIA-CARM-NONU | -88,9890         | 13,6659 | 2,6E-07                                        | 8,1E-08 | -3,2E-07 | 6,8E-08 | -40,5509                                               | 5,2106   |
| SUBNET_16 | CARR-SVIC-CARM | -88,8044         | 13,6754 | 1,7E-07                                        | 1,9E-07 | -3,7E-07 | 1,9E-07 | -20,2048                                               | 14,0824  |
| SUBNET_17 | SVIC-NONU-CARM | -88,8792         | 13,6437 | 2,9E-07                                        | 8,9E-08 | -2,7E-07 | 1,1E-07 | -36,5672                                               | 7,0898   |
| SUBNET_18 | NONU-SVIC-ICHA | -88,8185         | 13,5883 | 3,1E-07                                        | 1,4E-07 | -1,2E-07 | 1,6E-07 | -41,8231                                               | 14,4804  |
| SUBNET_22 | CARR-ICHA-SVIC | -88,7437         | 13,6200 | 1,8E-07                                        | 2,2E-07 | -2,1E-07 | 1,3E-07 | -16,9177                                               | 19,7263  |
| SUBNET_26 | CARR-CH15-ICHA | -88,6684         | 13,6173 | 1,1E-07                                        | 1,1E-07 | -3,0E-07 | 1,2E-07 | -36,6853                                               | 11,4493  |
| SUBNET_27 | ICHA-CH15-BT10 | -88,5948         | 13,5706 | 2,2E-07                                        | 1,4E-07 | -2,0E-07 | 1,0E-07 | 123,39                                                 | 12,162   |
| SUBNET_35 | LOLO-SBAR-BT10 | -88,4099         | 13,5739 | 6,8E-07                                        | 1,6E-07 | 4,0E-08  | 2,1E-07 | 5,4776                                                 | 11,9848  |
| SUBNET_36 | CH15-SBAR-BT10 | -88,4742         | 13,5951 | 4,4E-07                                        | 9,9E-08 | -1,7E-07 | 1,3E-07 | 132,4754                                               | 7,6537   |
| SUBNET_34 | CSJO-BT10-LOLO | -88,4206         | 13,5248 | 6,4E-07                                        | 1,3E-07 | -1,6E-07 | 2,2E-07 | -20,4554                                               | 10,3812  |

Triangles used for Delaunay triangulation and main parameters of each strain rate.
